# Supplementary material for: From centrosymmetric to noncentrosymmetric: cation-directed structural evolution in X3ZnB5O10(X = Na, K, Rb) and Cs12Zn4(B5O10)4crystals
Source: Royal Society of Chemistry journal article supplement (doi:10.1039/c9qi00285e), 2019-01-01
Supplement: c9qi00285e1.pdf [file c9qi00285e1.pdf]

**Supplementary Information**  
**From Centrosymmetric to Noncentrosymmetric: Cation-Directed Structural Evolution in  $X_3ZnB_5O_{10}$  ( $X=Na, K, Rb$ ) and  $Cs_{12}Zn_4(B_5O_{10})_4$  Crystals**

Tuohetijiang Baiheti,<sup>a,b,#</sup> Shujuan Han,<sup>a,b,#</sup> AbuduKadi Tudi,<sup>a,b</sup> Zhihua Yang,<sup>a</sup> H. H. Yu,<sup>\*a</sup> and Shilie Pan<sup>\*a</sup>

<sup>a</sup> CAS Key Laboratory of Functional Materials and Devices for Special Environments, Xinjiang Technical Institute of Physics & Chemistry, CAS; Xinjiang Key Laboratory of Electronic Information Materials and Devices, 40-1 South Beijing Road, Urumqi 830011, China.

<sup>b</sup> Center of Materials Science and Optoelectronics Engineering, University of Chinese Academy of Sciences, Beijing 100049, China.

Fax: (86)-991-3838957; Tel: (86)-991-3674558.

\*Corresponding author, E-mail: slpan@ms.xjb.ac.cn

Table S1. The atomic coordinates ( $\times 10^4$ ) and equivalent isotropic displacement parameters ( $\text{\AA}^2 \times 10^3$ ) for  $\text{Cs}_{12}\text{Zn}_4(\text{B}_5\text{O}_{10})_4$ ,  $U_{\text{eq}}$  is defined as one-third of the trace of the orthogonalized  $U_{ij}$  tensor, and the Bond Valence Sum (BVS) for each atom in asymmetric unit.

| Atom   | x        | y        | z         | U(eq) | BVS   |
|--------|----------|----------|-----------|-------|-------|
| Cs(1)  | 9189(1)  | 4509(1)  | 3848(1)   | 27(1) | 1.260 |
| Cs(2)  | 6333(1)  | 6960(1)  | 4125(1)   | 44(1) | 0.898 |
| Cs(3)  | 2653(1)  | 4702(1)  | 7091(1)   | 50(1) | 1.201 |
| Cs(4)  | 4392(1)  | 4352(1)  | 4122(1)   | 63(1) | 0.610 |
| Cs(5)  | 7589(1)  | 5784(1)  | 2392(1)   | 28(1) | 1.086 |
| Cs(6)  | 818(1)   | 5660(1)  | 5310(1)   | 31(1) | 0.824 |
| Cs(7)  | 1891(1)  | 7000(1)  | 4151(1)   | 33(1) | 1.068 |
| Cs(8)  | 6008(1)  | 5650(1)  | 6018(1)   | 36(1) | 0.863 |
| Cs(9)  | 8585(1)  | 3294(1)  | 5621(1)   | 39(1) | 1.122 |
| Cs(10) | 5190(1)  | 6925(1)  | 7508(1)   | 38(1) | 0.993 |
| Cs(11) | 5034(1)  | 1657(1)  | 7296(1)   | 39(1) | 0.781 |
| Cs(12) | 3338(1)  | 2914(1)  | 5708(1)   | 39(1) | 1.003 |
| Zn(1)  | 6652(1)  | 653(1)   | 8970(2)   | 20(1) | 2.074 |
| Zn(2)  | 4278(1)  | 1850(1)  | 3743(2)   | 24(1) | 2.140 |
| Zn(3)  | 7649(1)  | 3284(1)  | 2655(2)   | 22(1) | 2.089 |
| Zn(4)  | 5031(1)  | 4527(1)  | 7278(2)   | 23(1) | 2.137 |
| B(1)   | 5890(12) | 1331(13) | 10187(16) | 21(5) | 3.017 |
| B(2)   | 7979(12) | 5706(12) | 6295(13)  | 17(5) | 2.963 |
| B(3)   | 8048(16) | 2414(13) | 7416(18)  | 31(6) | 3.111 |
| B(4)   | 5594(13) | 2523(16) | 5223(16)  | 29(6) | 3.027 |
| B(5)   | 5684(13) | 1376(13) | 1719(16)  | 23(5) | 3.066 |
| B(6)   | 7678(13) | 5138(12) | 4746(15)  | 21(5) | 3.087 |
| B(7)   | 5903(13) | 187(14)  | 2452(15)  | 24(5) | 3.028 |
| B(8)   | 6312(13) | 5150(15) | 3839(17)  | 28(6) | 2.937 |
| B(9)   | 2834(13) | 5413(13) | 4894(16)  | 21(5) | 2.960 |
| B(10)  | 6612(14) | 2146(15) | 1409(16)  | 29(6) | 3.096 |
| B(11)  | 6644(12) | 2507(13) | 6857(15)  | 19(5) | 3.016 |
| B(12)  | 3723(13) | 6224(14) | 4443(17)  | 27(5) | 3.046 |
| B(13)  | 8548(13) | 6150(16) | 5057(16)  | 30(6) | 2.986 |
| B(14)  | 7019(15) | 4120(15) | 3777(17)  | 28(6) | 3.131 |
| B(15)  | 4113(14) | 5599(13) | 5984(17)  | 24(5) | 3.124 |
| B(16)  | 5778(13) | 3545(13) | 6321(17)  | 23(5) | 2.998 |
| B(17)  | 7349(13) | 1692(14) | 8217(17)  | 29(6) | 3.108 |
| B(18)  | 4939(14) | 906(14)  | 2718(17)  | 26(6) | 3.046 |
| B(19)  | 4215(15) | 3626(15) | 8038(19)  | 34(6) | 3.077 |
| B(20)  | 8824(15) | 2369(15) | 3705(18)  | 34(6) | 3.044 |
| O(1)   | 8272(7)  | 5564(7)  | 4535(9)   | 22(3) | 2.143 |
| O(2)   | 6172(7)  | 1993(8)  | 1963(10)  | 27(3) | 2.167 |
| O(3)   | 6309(7)  | 3164(7)  | 7024(9)   | 25(3) | 2.113 |
| O(4)   | 2132(7)  | 5165(7)  | 4755(9)   | 22(3) | 1.869 |

---

|       |          |          |          |       |       |
|-------|----------|----------|----------|-------|-------|
| O(5)  | 3579(7)  | 6956(8)  | 4312(10) | 28(3) | 2.096 |
| O(6)  | 6147(7)  | 2176(7)  | 5942(9)  | 25(3) | 2.034 |
| O(7)  | 6146(9)  | 761(8)   | 2073(12) | 42(4) | 2.059 |
| O(8)  | 6708(7)  | 2033(7)  | 7671(10) | 25(3) | 2.097 |
| O(9)  | 7678(7)  | 4449(7)  | 4345(9)  | 23(3) | 2.109 |
| O(10) | 5100(7)  | 1434(7)  | 2184(9)  | 20(3) | 2.096 |
| O(11) | 7837(8)  | 5105(8)  | 5807(9)  | 28(3) | 2.106 |
| O(12) | 5633(7)  | 5492(8)  | 3664(10) | 31(4) | 1.816 |
| O(13) | 7399(8)  | 2656(8)  | 6795(10) | 31(4) | 2.092 |
| O(14) | 6962(8)  | 5499(8)  | 4326(10) | 32(4) | 2.124 |
| O(15) | 7007(8)  | 3482(7)  | 3450(10) | 30(4) | 1.985 |
| O(16) | 5593(8)  | 4196(8)  | 6426(10) | 33(4) | 1.925 |
| O(17) | 4660(7)  | 5448(8)  | 6861(10) | 31(4) | 1.892 |
| O(18) | 8721(8)  | 2674(10) | 7551(11) | 44(5) | 2.133 |
| O(19) | 3442(8)  | 5245(8)  | 5751(11) | 34(4) | 1.899 |
| O(20) | 5384(8)  | 3198(9)  | 5437(11) | 36(4) | 2.122 |
| O(21) | 5348(7)  | 1306(8)  | 645(9)   | 26(3) | 1.900 |
| O(22) | 7433(8)  | 1291(9)  | 8980(10) | 41(4) | 1.998 |
| O(23) | 8362(8)  | 6250(7)  | 5941(9)  | 25(3) | 1.832 |
| O(24) | 8934(10) | 6653(9)  | 4831(12) | 50(5) | 1.904 |
| O(25) | 4434(8)  | 964(9)   | 3192(11) | 39(4) | 1.961 |
| O(26) | 7124(10) | 2648(10) | 1614(12) | 55(5) | 1.865 |
| O(27) | 4298(10) | 7087(10) | 3245(12) | 52(5) | 2.039 |
| O(28) | 8002(8)  | 1811(11) | 7981(13) | 57(6) | 2.042 |
| O(29) | 4299(10) | 3838(10) | 7207(11) | 52(5) | 2.034 |
| O(30) | 6349(9)  | 4467(9)  | 3553(13) | 49(5) | 2.075 |
| O(31) | 6272(8)  | -419(8)  | 2568(10) | 31(4) | 1.937 |
| O(32) | 2986(7)  | 5856(8)  | 4248(9)  | 31(4) | 2.074 |
| O(33) | 8626(9)  | 3034(8)  | 3550(11) | 40(4) | 2.057 |
| O(34) | 4262(8)  | 6046(9)  | 5378(11) | 41(4) | 2.181 |
| O(35) | 5280(9)  | 272(8)   | 2747(13) | 42(5) | 2.112 |
| O(36) | 4016(8)  | 5949(8)  | 3650(11) | 35(4) | 2.018 |
| O(37) | 7776(7)  | 5825(7)  | 7084(8)  | 24(3) | 2.017 |
| O(38) | 5824(7)  | 973(8)   | 9374(10) | 32(4) | 2.013 |
| O(39) | 6517(8)  | 1753(8)  | 571(9)   | 29(4) | 2.121 |
| O(40) | 5269(7)  | 2250(8)  | 4355(8)  | 27(3) | 2.078 |

---

Table S2. Selected bond distances (Å) and angles (deg) for Cs<sub>12</sub>Zn<sub>4</sub>(B<sub>5</sub>O<sub>10</sub>)<sub>4</sub>.

|               |           |                |           |
|---------------|-----------|----------------|-----------|
| Cs(1)-O(1)    | 3.040(13) | Cs(5)-O(37)#2  | 3.177(15) |
| Cs(1)-O(9)    | 3.149(13) | Cs(6)-O(4)     | 2.991(12) |
| Cs(1)-O(21)#4 | 3.193(13) | Cs(6)-O(6)#8   | 3.071(14) |
| Cs(1)-O(25)#3 | 3.052(16) | Cs(6)-O(7)#6   | 3.660(18) |
| Cs(1)-O(33)   | 3.019(16) | Cs(6)-O(25)#8  | 3.343(17) |
| Cs(1)-O(35)#3 | 3.329(14) | Cs(6)-O(31)#6  | 3.130(14) |
| Cs(1)-O(37)#2 | 3.073(12) | Cs(6)-O(35)#8  | 3.588(18) |
| Cs(1)-O(38)#1 | 3.045(13) | Cs(6)-O(38)#7  | 3.436(17) |
| Cs(2)-O(3)#2  | 3.040(13) | Cs(6)-O(40)#8  | 3.387(15) |
| Cs(2)-O(8)#2  | 3.117(14) | Cs(7)-O(2)#8   | 3.003(14) |
| Cs(2)-O(12)   | 3.104(16) | Cs(7)-O(4)     | 3.644(15) |
| Cs(2)-O(14)   | 3.036(14) | Cs(7)-O(5)     | 3.094(13) |
| Cs(2)-O(26)#5 | 3.495(18) | Cs(7)-O(6)#8   | 3.350(13) |
| Cs(2)-O(27)   | 3.602(18) | Cs(7)-O(7)#8   | 3.734(19) |
| Cs(2)-O(39)#5 | 3.196(15) | Cs(7)-O(15)#8  | 3.071(14) |
| Cs(3)-O(4)    | 3.318(13) | Cs(7)-O(32)    | 2.988(15) |
| Cs(3)-O(7)#6  | 2.953(14) | Cs(7)-O(40)#8  | 3.188(13) |
| Cs(3)-O(19)   | 2.998(14) | Cs(8)-O(11)    | 3.696(14) |
| Cs(3)-O(29)   | 3.463(19) | Cs(8)-O(12)    | 3.260(14) |
| Cs(3)-O(31)#6 | 3.207(15) | Cs(8)-O(14)    | 3.498(15) |
| Cs(3)-O(32)#5 | 3.166(14) | Cs(8)-O(16)    | 3.027(16) |
| Cs(3)-O(36)#5 | 3.059(15) | Cs(8)-O(17)    | 3.176(14) |
| Cs(3)-O(39)#6 | 3.763(16) | Cs(8)-O(30)#5  | 3.520(18) |
| Cs(4)-O(12)   | 3.425(15) | Cs(8)-O(34)    | 3.181(15) |
| Cs(4)-O(16)   | 3.361(15) | Cs(8)-O(37)    | 3.172(12) |
| Cs(4)-O(17)#2 | 3.498(14) | Cs(9)-O(5)#9   | 3.205(15) |
| Cs(4)-O(20)   | 3.113(15) | Cs(9)-O(9)     | 3.032(14) |
| Cs(4)-O(28)#7 | 3.419(17) | Cs(9)-O(10)#4  | 3.029(12) |
| Cs(4)-O(34)   | 3.794(18) | Cs(9)-O(13)    | 3.447(13) |
| Cs(4)-O(36)   | 3.189(15) | Cs(9)-O(15)    | 3.544(15) |
| Cs(5)-O(1)    | 2.968(13) | Cs(9)-O(18)    | 2.976(15) |
| Cs(5)-O(3)#2  | 3.053(14) | Cs(9)-O(21)#4  | 3.383(13) |
| Cs(5)-O(11)#2 | 3.026(13) | Cs(9)-O(33)    | 3.069(16) |
| Cs(5)-O(13)#2 | 3.123(16) | Cs(10)-O(2)#5  | 3.060(14) |
| Cs(5)-O(14)   | 3.427(15) | Cs(10)-O(10)#5 | 3.203(14) |
| Cs(5)-O(16)#2 | 3.530(15) | Cs(10)-O(15)#5 | 3.312(14) |
| Cs(5)-O(25)#3 | 3.277(15) | Cs(10)-O(17)   | 3.065(15) |

---

|                 |           |               |         |
|-----------------|-----------|---------------|---------|
| Cs(10)-O(18)#8  | 3.130(16) | B(1)-O(39)#12 | 1.39(3) |
| Cs(10)-O(30)#5  | 3.471(16) | B(2)-O(11)    | 1.34(3) |
| Cs(10)-O(34)    | 3.442(16) | B(2)-O(23)    | 1.46(2) |
| Cs(10)-O(40)#5  | 3.077(12) | B(2)-O(37)    | 1.34(2) |
| Cs(11)-O(6)     | 3.457(13) | B(3)-O(13)    | 1.33(3) |
| Cs(11)-O(8)     | 3.087(12) | B(3)-O(18)    | 1.31(3) |
| Cs(11)-O(23)#10 | 3.191(14) | B(3)-O(28)    | 1.44(3) |
| Cs(11)-O(24)#10 | 3.478(18) | B(4)-O(6)     | 1.37(3) |
| Cs(11)-O(27)#5  | 3.309(16) | B(4)-O(20)    | 1.43(3) |
| Cs(11)-O(31)#11 | 3.263(15) | B(4)-O(40)    | 1.31(3) |
| Cs(11)-O(33)#6  | 3.717(16) | B(5)-O(2)     | 1.47(3) |
| Cs(11)-O(35)#11 | 3.786(17) | B(5)-O(7)     | 1.46(3) |
| Cs(11)-O(38)    | 3.167(15) | B(5)-O(10)    | 1.47(2) |
| Cs(12)-O(22)#7  | 2.945(14) | B(5)-O(21)    | 1.48(2) |
| Cs(12)-O(23)#10 | 3.232(14) | B(6)-O(1)     | 1.50(2) |
| Cs(12)-O(24)#10 | 3.122(17) | B(6)-O(9)     | 1.45(3) |
| Cs(12)-O(26)#6  | 3.176(16) | B(6)-O(11)    | 1.47(2) |
| Cs(12)-O(27)#5  | 3.513(18) | B(6)-O(14)    | 1.45(3) |
| Cs(12)-O(29)    | 2.921(16) | B(7)-O(7)     | 1.38(3) |
| Cs(12)-O(39)#6  | 3.412(14) | B(7)-O(31)    | 1.34(3) |
| Zn(1)-O(4)#4    | 1.981(13) | B(7)-O(35)    | 1.38(3) |
| Zn(1)-O(22)     | 1.909(15) | B(8)-O(12)    | 1.38(3) |
| Zn(1)-O(31)#11  | 1.968(14) | B(8)-O(14)    | 1.37(3) |
| Zn(1)-O(38)     | 1.934(14) | B(8)-O(30)    | 1.39(3) |
| Zn(2)-O(18)#7   | 1.927(16) | B(9)-O(4)     | 1.35(2) |
| Zn(2)-O(24)#10  | 1.931(14) | B(9)-O(19)    | 1.41(3) |
| Zn(2)-O(25)     | 1.952(16) | B(9)-O(32)    | 1.37(3) |
| Zn(2)-O(40)     | 1.932(13) | B(10)-O(2)    | 1.36(3) |
| Zn(3)-O(15)     | 1.962(13) | B(10)-O(26)   | 1.33(3) |
| Zn(3)-O(26)     | 1.940(15) | B(10)-O(39)   | 1.39(2) |
| Zn(3)-O(33)     | 1.919(16) | B(11)-O(3)    | 1.47(3) |
| Zn(3)-O(37)#2   | 1.959(14) | B(11)-O(6)    | 1.49(3) |
| Zn(4)-O(12)#5   | 1.949(14) | B(11)-O(8)    | 1.47(2) |
| Zn(4)-O(16)     | 1.976(14) | B(11)-O(13)   | 1.48(2) |
| Zn(4)-O(17)     | 1.932(15) | B(12)-O(5)    | 1.44(3) |
| Zn(4)-O(29)     | 1.890(16) | B(12)-O(32)   | 1.49(3) |
| B(1)-O(21)#12   | 1.39(2)   | B(12)-O(34)   | 1.44(3) |
| B(1)-O(38)      | 1.34(2)   | B(12)-O(36)   | 1.52(3) |

---

---

|                        |           |                        |           |
|------------------------|-----------|------------------------|-----------|
| B(13)-O(1)             | 1.36(3)   | O(26)-Zn(3)-O(15)      | 109.2(6)  |
| B(13)-O(23)            | 1.45(2)   | O(26)-Zn(3)-O(37)#2    | 109.2(6)  |
| B(13)-O(24)            | 1.32(3)   | O(33)-Zn(3)-O(15)      | 106.6(6)  |
| B(14)-O(9)             | 1.39(3)   | O(33)-Zn(3)-O(26)      | 119.2(8)  |
| B(14)-O(15)            | 1.32(3)   | O(33)-Zn(3)-O(37)#2    | 106.5(6)  |
| B(14)-O(30)            | 1.36(3)   | O(37)#2-Zn(3)-O(15)    | 105.2(6)  |
| B(15)-O(17)            | 1.37(3)   | O(12)#5-Zn(4)-O(16)    | 113.1(6)  |
| B(15)-O(19)            | 1.37(3)   | O(17)-Zn(4)-O(12)#5    | 111.3(6)  |
| B(15)-O(34)            | 1.33(3)   | O(17)-Zn(4)-O(16)      | 108.3(6)  |
| B(16)-O(3)             | 1.38(3)   | O(29)-Zn(4)-O(12)#5    | 101.7(7)  |
| B(16)-O(16)            | 1.33(3)   | O(29)-Zn(4)-O(16)      | 105.4(7)  |
| B(16)-O(20)            | 1.42(3)   | O(29)-Zn(4)-O(17)      | 116.9(8)  |
| B(17)-O(8)             | 1.37(3)   | O(38)-B(1)-O(21)#12    | 122(2)    |
| B(17)-O(22)            | 1.32(3)   | O(38)-B(1)-O(39)#12    | 118.4(17) |
| B(17)-O(28)            | 1.40(3)   | O(39)#12-B(1)-O(21)#12 | 119.1(18) |
| B(18)-O(10)            | 1.37(3)   | O(11)-B(2)-O(23)       | 118.2(15) |
| B(18)-O(25)            | 1.35(2)   | O(37)-B(2)-O(11)       | 122.4(19) |
| B(18)-O(35)            | 1.38(3)   | O(37)-B(2)-O(23)       | 119.3(18) |
| B(19)-O(27)#5          | 1.41(3)   | O(13)-B(3)-O(28)       | 117(2)    |
| B(19)-O(29)            | 1.33(3)   | O(18)-B(3)-O(13)       | 126(2)    |
| B(19)-O(36)#5          | 1.35(3)   | O(18)-B(3)-O(28)       | 117(2)    |
| B(20)-O(5)#9           | 1.38(3)   | O(6)-B(4)-O(20)        | 118.3(19) |
| B(20)-O(27)#9          | 1.39(3)   | O(40)-B(4)-O(6)        | 122(2)    |
| B(20)-O(33)            | 1.34(3)   | O(40)-B(4)-O(20)       | 120(2)    |
| O(22)-Zn(1)-O(4)#4     | 108.1(6)  | O(2)-B(5)-O(21)        | 109.8(18) |
| O(22)-Zn(1)-O(31)#11   | 99.7(6)   | O(7)-B(5)-O(2)         | 109.1(17) |
| O(22)-Zn(1)-O(38)      | 118.8(7)  | O(7)-B(5)-O(10)        | 110.3(18) |
| O(31)#11-Zn(1)-O(4)#4  | 110.4(6)  | O(7)-B(5)-O(21)        | 106.8(17) |
| O(38)-Zn(1)-O(4)#4     | 109.7(6)  | O(10)-B(5)-O(2)        | 109.1(16) |
| O(38)-Zn(1)-O(31)#11   | 109.6(6)  | O(10)-B(5)-O(21)       | 111.8(16) |
| O(18)#7-Zn(2)-O(24)#10 | 126.7(7)  | O(9)-B(6)-O(1)         | 108.9(14) |
| O(18)#7-Zn(2)-O(25)    | 99.4(7)   | O(9)-B(6)-O(11)        | 110.6(17) |
| O(18)#7-Zn(2)-O(40)    | 111.8(7)  | O(11)-B(6)-O(1)        | 109.5(16) |
| O(24)#10-Zn(2)-O(25)   | 107.3(7)  | O(14)-B(6)-O(1)        | 107.3(17) |
| O(14)-B(6)-O(9)        | 113.3(17) | O(31)-B(7)-O(7)        | 121.8(18) |
| O(14)-B(6)-O(11)       | 107.2(15) | O(31)-B(7)-O(35)       | 121(2)    |
| O(24)#10-Zn(2)-O(40)   | 103.6(6)  | O(35)-B(7)-O(7)        | 117(2)    |
| O(40)-Zn(2)-O(25)      | 106.6(6)  | O(12)-B(8)-O(30)       | 122(2)    |

---

|                   |           |                       |           |
|-------------------|-----------|-----------------------|-----------|
| O(14)-B(8)-O(12)  | 118(2)    | O(24)-B(13)-O(23)     | 116(2)    |
| O(14)-B(8)-O(30)  | 119.8(19) | O(15)-B(14)-O(9)      | 123(2)    |
| O(4)-B(9)-O(19)   | 120.6(18) | O(15)-B(14)-O(30)     | 118(2)    |
| O(4)-B(9)-O(32)   | 122.4(19) | O(30)-B(14)-O(9)      | 119(2)    |
| O(32)-B(9)-O(19)  | 117.0(17) | O(17)-B(15)-O(19)     | 117.5(19) |
| O(2)-B(10)-O(39)  | 118(2)    | O(34)-B(15)-O(17)     | 120(2)    |
| O(26)-B(10)-O(2)  | 124.1(19) | O(34)-B(15)-O(19)     | 123(2)    |
| O(26)-B(10)-O(39) | 117.9(19) | O(3)-B(16)-O(20)      | 116.5(19) |
| O(3)-B(11)-O(6)   | 110.0(15) | O(16)-B(16)-O(3)      | 125(2)    |
| O(3)-B(11)-O(13)  | 108.1(17) | O(16)-B(16)-O(20)     | 118.3(19) |
| O(8)-B(11)-O(3)   | 109.3(15) | O(8)-B(17)-O(28)      | 117(2)    |
| O(8)-B(11)-O(6)   | 107.9(17) | O(22)-B(17)-O(8)      | 127(2)    |
| O(8)-B(11)-O(13)  | 110.4(15) | O(22)-B(17)-O(28)     | 116(2)    |
| O(13)-B(11)-O(6)  | 111.0(16) | O(10)-B(18)-O(35)     | 119.4(18) |
| O(5)-B(12)-O(32)  | 108.8(17) | O(25)-B(18)-O(10)     | 123(2)    |
| O(5)-B(12)-O(36)  | 109.9(16) | O(25)-B(18)-O(35)     | 117(2)    |
| O(32)-B(12)-O(36) | 103.5(17) | O(29)-B(19)-O(27)#5   | 117(2)    |
| O(34)-B(12)-O(5)  | 114(2)    | O(29)-B(19)-O(36)#5   | 123(2)    |
| O(34)-B(12)-O(32) | 112.3(17) | O(36)#5-B(19)-O(27)#5 | 119(2)    |
| O(34)-B(12)-O(36) | 108.1(18) | O(5)#9-B(20)-O(27)#9  | 119(2)    |
| O(1)-B(13)-O(23)  | 116.4(19) | O(33)-B(20)-O(5)#9    | 122(2)    |
| O(24)-B(13)-O(1)  | 127.7(19) | O(33)-B(20)-O(27)#9   | 119(2)    |

Symmetry transformations used to generate equivalent atoms:

- (1)  $x+1/2, -y+1/2, z-1/2$  (2)  $x, -y+1, z-1/2$  (3)  $x+1/2, y+1/2, z$  (4)  $x+1/2, -y+1/2, z+1/2$   
(5)  $x, -y+1, z+1/2$  (6)  $x-1/2, -y+1/2, z+1/2$  (7)  $x-1/2, -y+1/2, z-1/2$  (8)  $x-1/2, y+1/2, z$   
(9)  $x+1/2, y-1/2, z$  (10)  $x-1/2, y-1/2, z$  (11)  $x, -y, z+1/2$  (12)  $x, y, z+1$   
(13)  $x, -y, z-1/2$  (14)  $x, y, z-1$

Table S3. The anhydrous alkali-zinc borates with formula  $X_3ZnB_5O_{10}$ .

| Ref No.   | Formula                    | Space Group                     | B-O-Zn Framework            | Code No. |
|-----------|----------------------------|---------------------------------|-----------------------------|----------|
| 1         | $Na_3ZnB_5O_{10}$          | <i>Pbca</i> (No.61)             | 2D $[ZnB_5O_{10}]_{\infty}$ | 423705   |
| 2         | $Na_3ZnB_5O_{10}$          | <i>P2<sub>1</sub>/n</i> (No.14) | 2D $[ZnB_5O_{10}]_{\infty}$ | 417848   |
| 3         | $NaK_2(ZnB_5O_{10})$       | <i>C2/c</i> (No.15)             | 2D $[ZnB_5O_{10}]_{\infty}$ | 167139   |
| 4         | $K_3ZnB_5O_{10}$           | <i>P2<sub>1</sub>/n</i> (No.14) | 2D $[ZnB_5O_{10}]_{\infty}$ | 262977   |
| 5         | $Rb_3ZnB_5O_{10}$          | <i>P2<sub>1</sub>/n</i> (No.14) | 2D $[ZnB_5O_{10}]_{\infty}$ | 425890   |
| This work | $Cs_{12}Zn_4(B_5O_{10})_4$ | <i>Cc</i> (No.9)                | 3D $[ZnB_5O_{10}]_{\infty}$ | 1838047  |



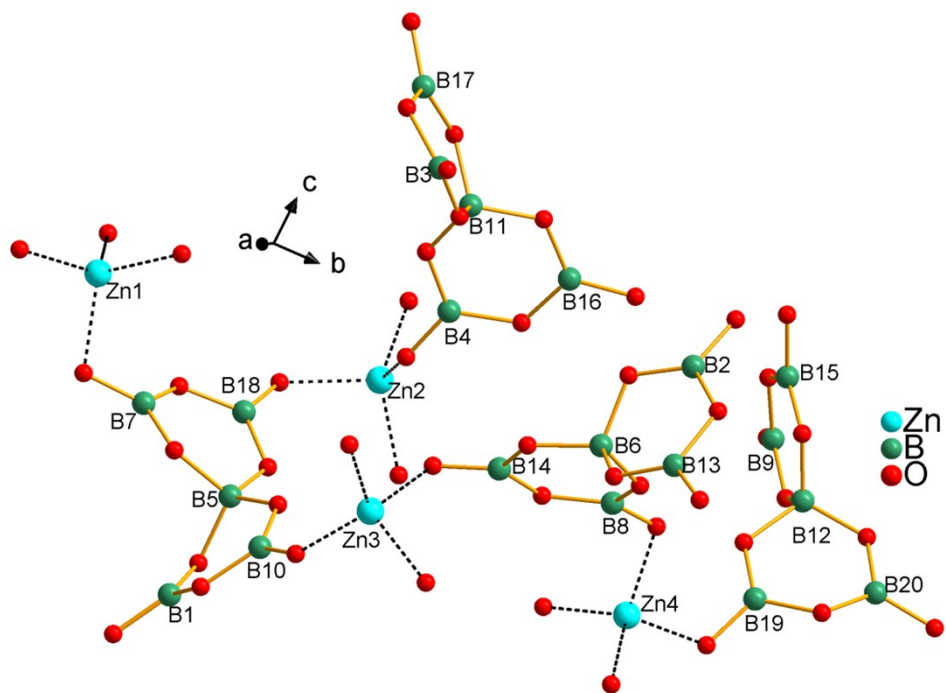

Figure S1. Crystallographic unique Zn, B and O atoms in  $\text{Cs}_{12}\text{Zn}_4(\text{B}_5\text{O}_{10})_4$ .

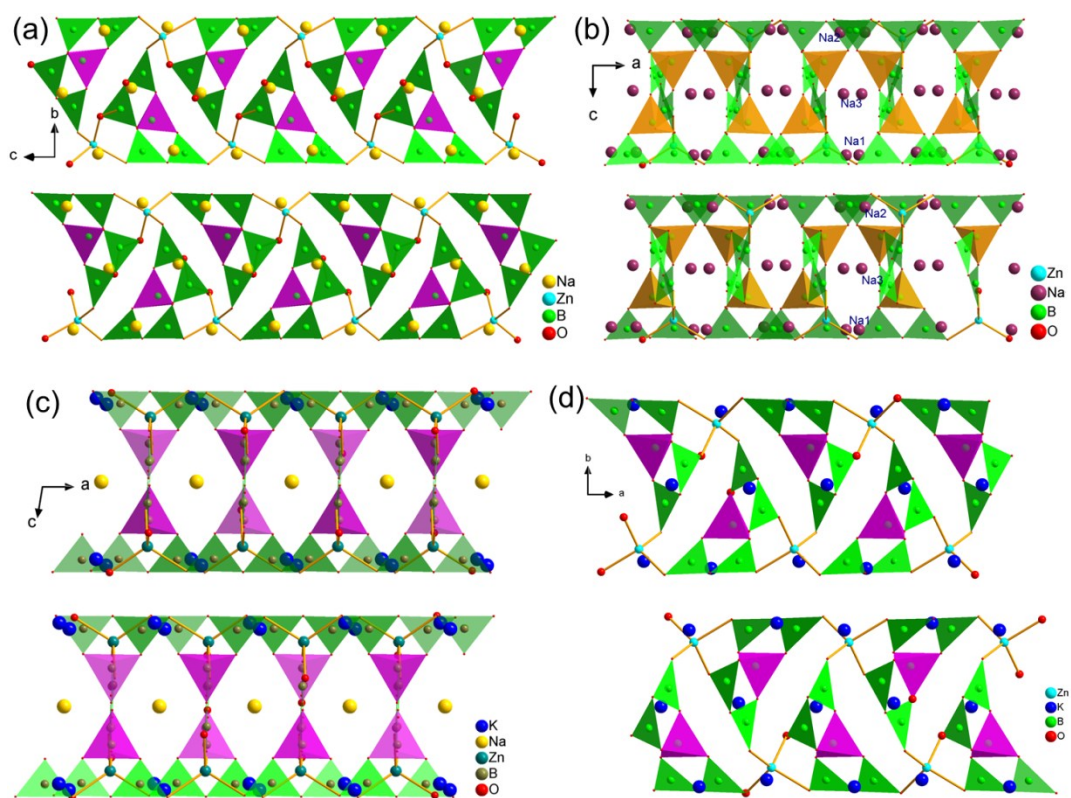

Figure S2. (a) Crystal structure of  $\text{Na}_3\text{ZnB}_5\text{O}_{10}$  ( $P2_1/n$ ). (b) Crystal structure of  $\text{Na}_3\text{ZnB}_5\text{O}_{10}$  ( $Pbca$ ). (c) Crystal structure of  $\text{NaK}_2(\text{ZnB}_5\text{O}_{10})$ . (d) Crystal structure of  $\text{K}_3\text{ZnB}_5\text{O}_{10}$ .

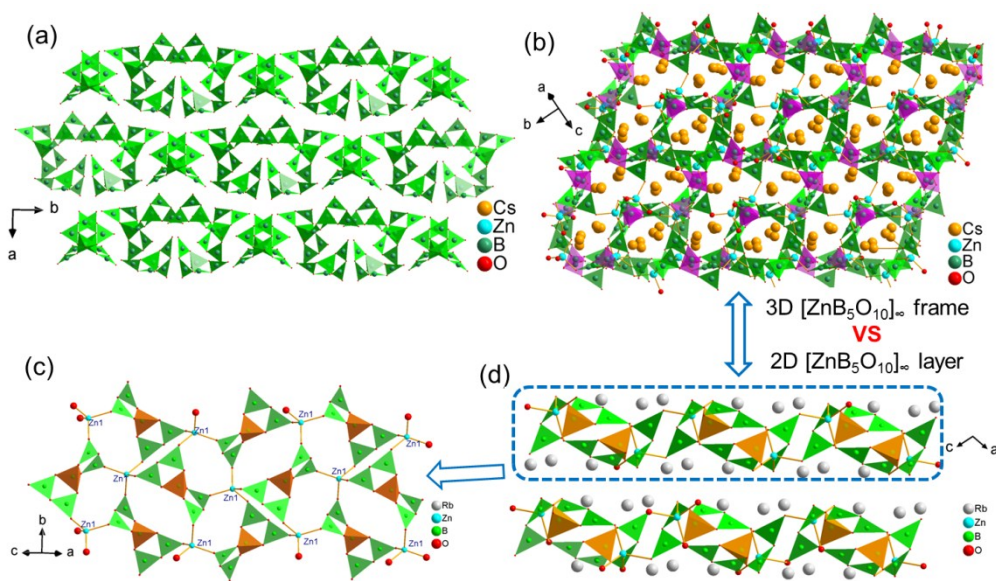

Figure S3. (a) Pseudo layer formed by the B<sub>5</sub>O<sub>10</sub> groups in Cs<sub>12</sub>Zn<sub>4</sub>(B<sub>5</sub>O<sub>10</sub>)<sub>4</sub>. (b) The 3D structure of Cs<sub>12</sub>Zn<sub>4</sub>(B<sub>5</sub>O<sub>10</sub>)<sub>4</sub>. (c) The 2D [ZnB<sub>5</sub>O<sub>10</sub>]<sub>∞</sub> layer in Rb<sub>3</sub>ZnB<sub>5</sub>O<sub>10</sub>. (d) The 3D structure of Rb<sub>3</sub>ZnB<sub>5</sub>O<sub>10</sub>.

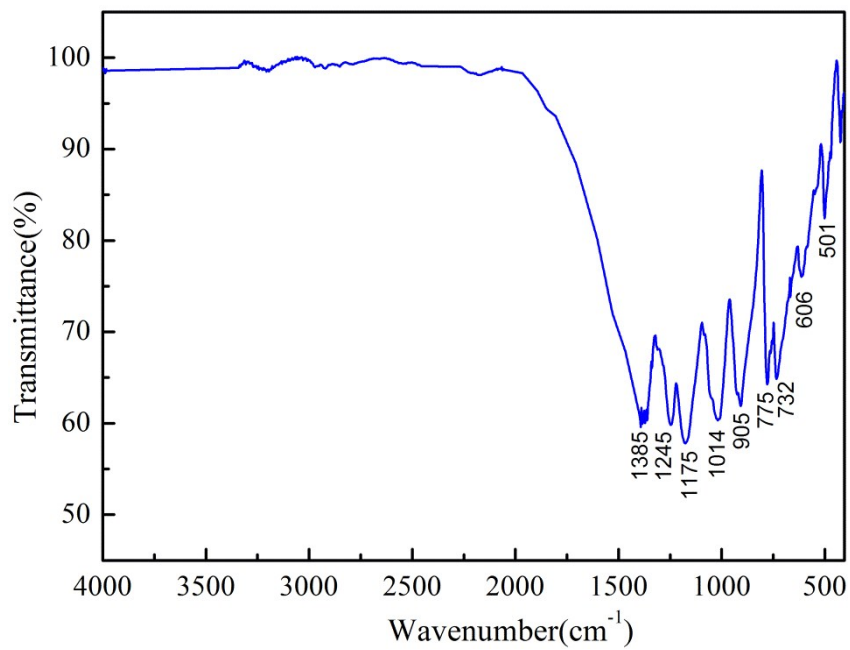

Figure S4. The IR spectrum of Cs<sub>12</sub>Zn<sub>4</sub>(B<sub>5</sub>O<sub>10</sub>)<sub>4</sub>.

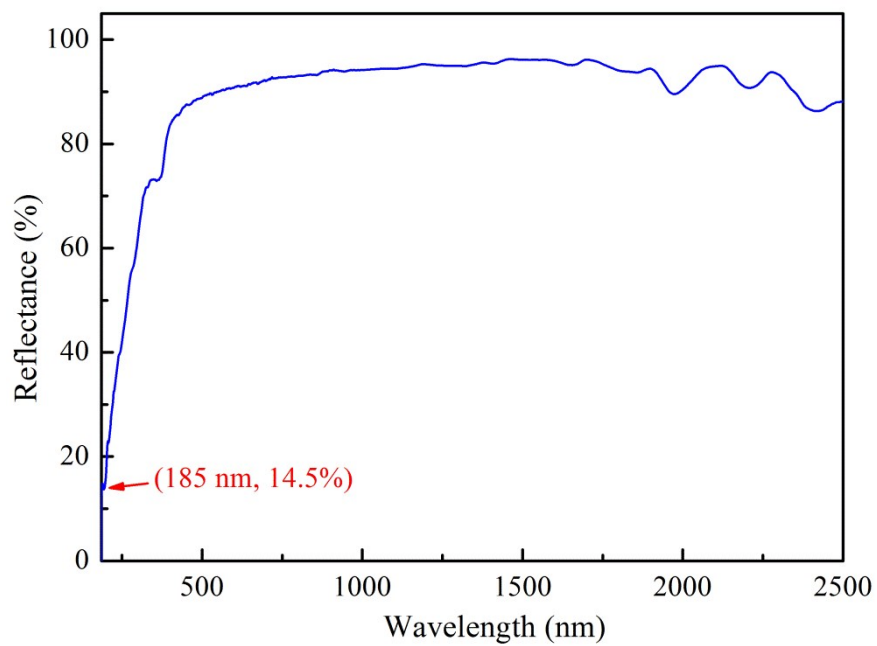

Figure S5. The UV-vis-NIR diffuse reflectance spectrum of  $\text{Cs}_{12}\text{Zn}_4(\text{B}_5\text{O}_{10})_4$ .

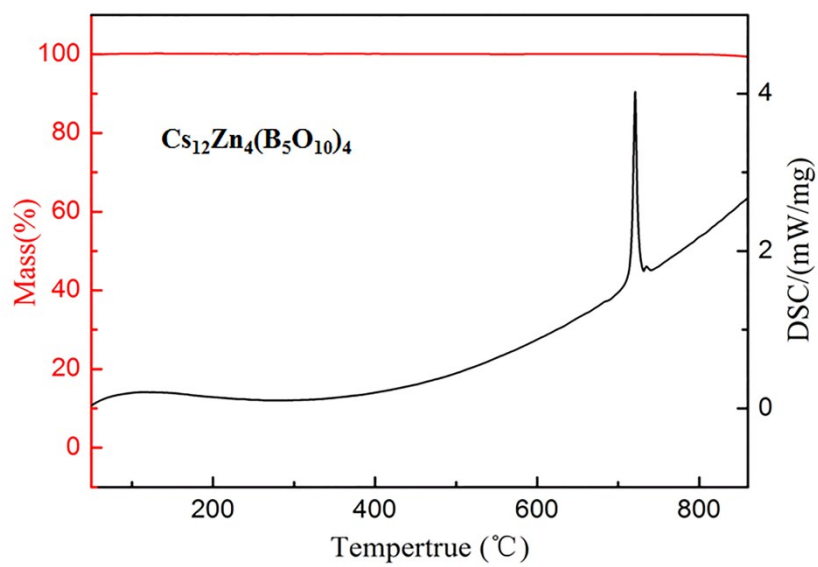

Figure S6. The TG-DSC curves of polycrystalline sample of  $\text{Cs}_{12}\text{Zn}_4(\text{B}_5\text{O}_{10})_4$ .

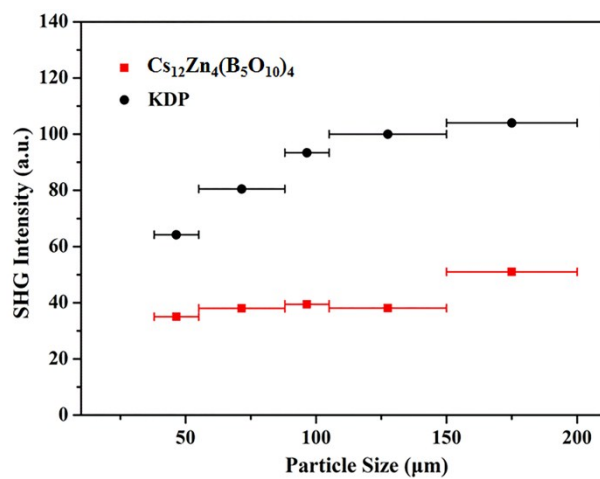

Figure S7. Powder SHG measurement result of Cs<sub>12</sub>Zn<sub>4</sub>(B<sub>5</sub>O<sub>10</sub>)<sub>4</sub>.
